# Supplementary material
Source: publisher site journal article supplement (https://www.dovepress.com/get_supplementary_file.php?f=471068.docx)
Supplement: Supplementary file 1 [file get_supplementary_file.php]

Table S1 Normality test of SII

| methods | statistics | P |
| --- | --- | --- |
| Anderson-Darling normality test | 704.7169 | <0.000001 |
| Cramer-von Mises normality test | 118.5904 | <0.000001 |
| Lilliefors (Kolmogorov-Smirnov) normality test | 0.1562 | <0.000001 |
| Pearson chi-square normality test | 5599.522 | <0.000001 |


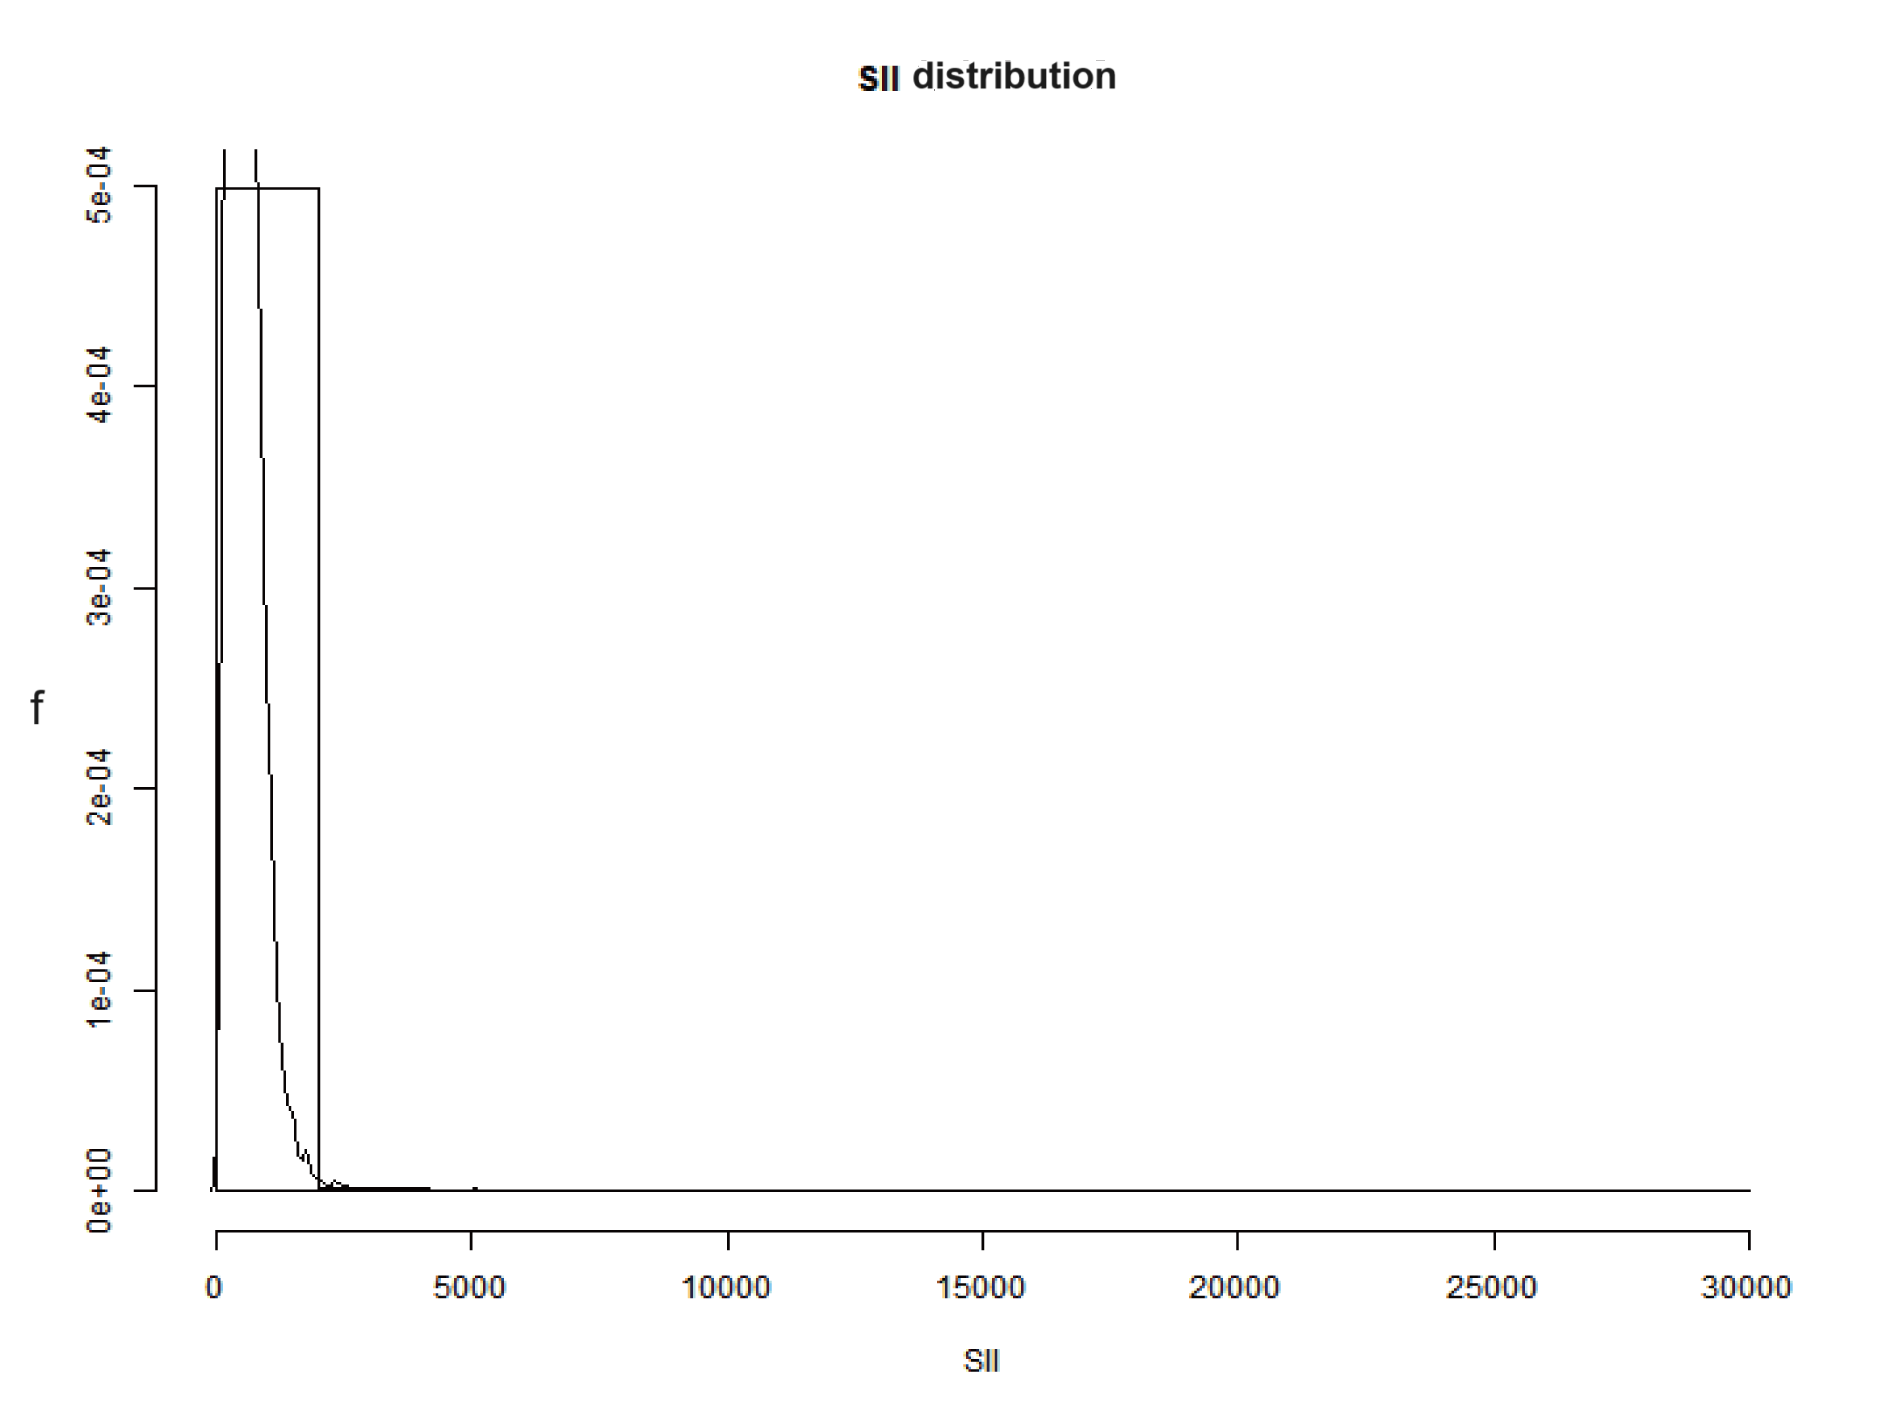


Figure S1 Normality test of SII
